# Supplementary material for: Synthesis of (E)-5-(2-arylvinyl)-2-(hetero)arylpyridines, (E)-2-(2-arylvinyl)-5-methoxycarbonylpyridines and (E,E)-2,5-bis(2-arylvinyl)pyridines as polarity and pH probesElectronic supplementary information (ESI) available: details of syntheses and spectroscopic data. See http://www.rsc.org/suppdata/p2/b2/b200446c/
Source: Royal Society of Chemistry journal article supplement (doi:10.1039/b200446c), 2002-04-11
Supplement: b200446c.doc [file b200446c.doc]

# Supplementary data

**Synthesis of (*E*)-5-(2-arylvinyl)-2-(hetero)arylpyridines, (*E*)-2-(2-arylvinyl)-5-methoxycarbonylpyridines and *(E,E)*-2,5-bis(2-arylvinyl)pyridines as polarity and pH-probes**

**Erik Van der Eycken*, Zhang Jidong, Amuri Kilonda, Frans Compernolle, Suzanne Toppet and Georges Hoornaert**

Laboratory for Organic Synthesis

K.U.Leuven, Department of Chemistry, Celestijnenlaan 200 F, B-3001 Heverlee, Belgium

**Mark Van der Auweraer*, Carine Jackers, Wouter Verbouwe, Frans C. De Schryver**

Laboratory for Molecular Dynamics and Spectroscopy

K.U.Leuven, Department of Chemistry, Celestijnenlaan 200 F, B-3001 Heverlee, Belgium

- 1. *(E)-5-(2-arylvinyl)-2-(hetero)arylpyridines* ***7***

- - 1. *Diels-Alder reaction of 3,6-disubstituted-5-chloro-2H-1,4-oxazinones* ***2***

A solution of the oxazinones20 **2a** or **2b** (0.01 mol) and bicyclo[2.2.1]hepta-2,5-diene (0.03 mol) in chloroform (100 cm3) was refluxed overnight. The solvent was distilled off and the residue was heated at 140 °C in a sealed tube. Column chromatography on silica gel (dichloromethane) followed by recrystallization (dichloromethane-hexane) gave the corresponding 3,6-disubstituted 2-chloropyridines **3a** (94%), mp 102-103 °C (Found: 233.0669. C13H12ClNO requires 233.0674); max(KBr)/cm-1 1608 (C=N); H(250 MHz; CDCl3) 7.90 (2H, d, *J* 10, 6-Ar-2- and 6-H), 7.60 (1H, d, *J* 8, 4-H), 7.50 (1H, d, *J* 8, 5-H), 7.00 (2H, d, *J* 10,6-Ar-3- and 5-H), 3.90 (3H, s, OCH3), 2.50 (3H, s, CH3); C(62.5 MHz; CDCl3) 160.6 (6-Ar-4-C), 152.2 (2-C), 151.3 (6-C), 140.0 (4-C), 135.0 (3-C), 129.3 (6-Ar-1-C), 128.1 (6-Ar-2- and 6-C), 118.0 (5-C), 114.1 (6-Ar-3- and 5-C), 55.3 (OCH3), 19.3 (CH3); *m/z* (% relative intensity) 233 (M+, 100), 218 (M+-CH3, 24), 190 (M+-CH3-CO, 42) and **3b** (91%), mp 78-79 °C (Found: 209.0066. C10H8ClNS requires 209.0071); max(KBr)/cm-1 1593 (C=N); H(250 MHz; CDCl3) 7.56 (1H, m, 6-thienyl-3-H), 7.50 (1H, d, *J* 8, 4-H), 7.43 (1H, d, *J* 8, 5-H), 7.37 (1H, m, 6-thienyl-5-H), 7.07 (1H, m, 6-thienyl-4-H), 2.36 (3H, s, CH3); C(62.5 MHz; CDCl3) 151.0 (6-C), 150.7 (2-C), 143.1 (6-thienyl-2-C), 139.8 (4-C), 130.3 (3-C), 128.0 (6-thienyl-4-C), 127.5 (6-thienyl-3-C), 125.0 (6-thienyl-5-C), 117.4 (5-C), 19.3 (CH3); *m/z* 209 (M+, 100), 208 (M+-H, 20), 174 (M+-Cl, 17).

- - 1. *Dechlorination of the 2-chloropyridines* ***3a,b***

A mixture of the 2-chloropyridines **3a** or **3b** (2 mmol), K2CO3 (0.276 g, 2 mmol) and Pd/C (10%, 100 mg) in methanol (25 cm3) and tetrahydrofuran (25 cm3) was stirred for 3 h under an atmosphere of hydrogen (1 atm). After removal of the catalyst by filtration, the filtrates were evaporated under reduced pressure. Column chromatography on silica gel with ethyl acetate-chloroform (1 : 9) followed by recrystallization (dichloromethane-hexane) afforded the desired compounds **4a** (90%), mp 55-57 °C (Found: 199.0995. C13H13NO requires 199.0997); max(KBr)/cm-1 1610 (C=N); H(250 MHz; CDCl3) 8.48 (1H, d, *J* 2, 6-H), 7.92 (2H, d, *J* 10, 2-Ar-2- and 6-H), 7.56 (1H, d, *J* 8, 3-H), 7.50 (1H, dd, *J* 2, *J* 8, 4-H), 7.00 (2H, d, *J* 10, 2-Ar-3- and 5-H), 3.88 (3H, s, OCH3), 2.30 (3H, s, 5-CH3); C(62.5 MHz; CDCl3) 160.2 (2-Ar-4-C), 154.6 (2-C), 149.9 (6-C), 137.2 (4-C), 132.2 (2-Ar-1-C), 130.8 (5-C), 129.7 (2-Ar-2- and 6-C), 119.3 (3-C), 114.1 (2-Ar-3- and 5-C), 55.3 (OCH3), 18.0 (5-CH3); *m/z* (% relative intensity) 199 (M+, 100), 184 (M+-CH3, 35), 156 (M+-CH3-CO, 37) and **4b** (96%), mp 63-64 °C (Found: 175.0456. C10H9NS requires 175.0457); max(KBr)/cm-1 1598 (C=N); H(250 MHz; CDCl3) 8.33 (1H, d, *J* 2, 6-H), 7.46 (1H, m, 2-thienyl-3-H), 7.44 (1H, d, *J* 8, 3-H), 7.35 (1H, dd, *J* 8, *J* 2, 4-H), 7.28 (1H, m, 2-thienyl-5-H), 7.02 (1H, m, 2-thienyl-4-H), 2.20 (3H, s, CH3); C(62.5 MHz; CDCl3) 149.6 (2-C), 149.4 (6-C), 144.6 (2-thienyl-2-C), 136.8 (4-C), 131.1 (5-C), 127.6 (2-thienyl-4-C), 126.5 (2-thienyl-3-C), 123.6 (2-thienyl-5-C), 117.9 (3-C), 17.8 (CH3); *m/z* (% relative intensity) 175 (M+, 100), 174 (M+-H, 36), 147 (M+-H-HCN, 19).

*1.1.3. Bromination of 2-(hetero)aryl-5-methylpyridines* ***4***

A mixture of pyridine **4a** or **4b** (0.01 mol), *N-*bromosuccinimide (1.95 g, 0.011 mol) and a catalytic amount of benzoyl peroxide in carbon tetrachloride (100 cm3) was refluxed under nitrogen atmosphere for about 20 min. Upon cooling, the reaction mixture was filtered, and the filtrate was washed with water and dried over magnesium sulphate. After filtration the solvent was removed by evaporation *in vacuo.* Column chromatography on silica gel with ethyl acetate-chloroform (5 : 95) as the eluent followed by recrystallization (dichloromethane-hexane) gave the desired compounds **5a** (60%), mp 124-125 °C (Found: 277.0098. C13H12BrNO requires 277.0088); max(KBr)/cm-1 1610 (C=N); H(250 MHz; CDCl3) 8.65 (1H, d, *J* 2, 6-H), 7.95 (2H, d, *J* 10, 2-Ar-2- and 6-H), 7.74 (1H, dd, *J* 8, *J* 2, 4-H), 7.64 (1H, d, *J* 8, 3-H,), 7.00 (2H, d, *J* 10, 2-Ar-3- and 5-H), 4.50 (2H, s, BrCH2), 3.90 (3H, s, OCH3); C(62.5 MHz; CDCl3) 161.0 (2-Ar-4-C), 157.2 (2-C), 149.6 (6-C), 137.5 (4-C), 131.4 (5-C), 131.4 (2-Ar-1-C), 126.4 (2-Ar-2- and 6-C), 119.7 (3-C), 114.4 (2-Ar-3- and 5-C), 55.4 (OCH3), 29.9 (BrCH2); *m/z* (% relative intensity) 277 (M+, 11), 276 (M+-H, 4), 198 (M+-Br, 100) and **5b** (73%), mp 66-68 °C (Found: 252.9561. C10H8BrNS requires 252.9564); max(KBr)/cm-1 1596 (C=N); H(250 MHz; CDCl3) 8.52 (1H, d, *J* 2, 6-H), 7.65 (1H, dd, *J* 8, *J* 2, 4-H), 7.57 (1H, d, *J* 8, 3-H,), 7.55 (1H, m, 2-thienyl-3-H), 7.38 (1H, m, 2-thienyl-5-H), 7.08 (1H, m, 2-thienyl-4-H), 4.45 (2H, s, BrCH2); C(62.5 MHz; CDCl3) 152.4 (2-C), 149.6 (6-C), 144.2 (2-thienyl-2-C), 137.3 (4-C), 131.7 (5-C), 128.1 (2-thienyl-3-C), 128.1 (2-thienyl-4-C), 125.1 (2-thienyl-5-C), 118.6 (3-C), 30.0 (BrCH2); *m/z* 253 (M+, 6), 174 (M+-Br, 100), 147 (M+-Br-HCN, 16).

*1.1.4. Preparation of 5-[2-(hetero)aryl]pyridylmethyl triphenylphosphonium bromides* ***6***

A mixture of 5-bromomethyl-2-(hetero)arylpyridines **5a** or **5b** (10 mmol) and triphenylphosphine (11 mmol) in xylene (100 cm3) was refluxed and stirred for 24 h. About 10 min after refluxing, the clear solution became cloudy and then turned to a white suspension. After filtration the gray solid was washed with xylene and dried. This yielded the compound **6a** (95%) as a gray crystalline solid, mp 240-244 °C and the compound **6b** (94%) as a brown crystalline solid, mp 256-260 °C.

*1.1.5. The synthesis of 5-(2-aryl)vinyl-2-(hetero)arylpyridines* ***7***

A mixture of 5-[2-(hetero)aryl]pyridylmethyl triphenylphosphonium bromide **6** (3.0 mmol), *para*-substituted benzaldehyde (3.6 mmol) and potassium *tert*-butoxide (3.3 mmol) in tetrahydrofuran (80 cm3) was refluxed and stirred under nitrogen atmosphere for 24 h. The solvent was removed and the residue was subjected to column chromatography on silica gel with ethyl acetate (2%)-chloroform as the eluent. Recrystallization (dichloromethane-hexane) gave the pure *trans*-product **7a** (62%), mp 193-194 °C (Found: 312.1263. C21H16N2O requires 312.1261. Found: C, 80.48; H, 5.06; N: 8.78. C21H16N2O requires C, 80.75; H, 5.16; N, 8.97%); max(KBr)/cm-1 2220 (CN), 1610 (C=N); H(250 MHz; CDCl3) 8.75 (1H, d, *J* 2, 6-H), 8.00 (2H, d, *J* 9, 2-Ar-2- and 6-H), 7.90 (1H, dd, *J* 8, *J* 2, 4-H), 7.70 (1H, d, *J* 8, 3-H), 7.64 (2H, d, *J* 8, 5-vinyl-Ar-3- and 5-H), 7.60 (2H, d, *J* 8, 5-vinyl-Ar-2- and 6-H), 7.22 (1H, d, *J* 16, 5-vinyl-H), 7.11 (1H, d, *J* 16, 5-vinyl-H), 7.00 (2H, d, *J* 9, 2-Ar-3- and 5-H), 3.90 (3H, s, OCH3); C(62.5 MHz; CDCl3) 160.7 (2-Ar-4-C), 156.7 (2-C), 148.8 (6-C), 141.3 (5-vinyl-Ar-1-C), 133.5 (4-C), 132.5 (5-vinyl-Ar-3- and 5-C), 131.3 (5-C), 129.7 (2-Ar-1-C), 128.8 and 128.6 (vinyl-C), 128.1 (5-vinyl-Ar-2- and 6-C), 126.9 (2-Ar-2- and 6-C), 119.5 (3-C), 118.8 (5-vinyl-Ar-4-C), 114.4 (2-Ar-3- and 5-C), 110.9 (CN), 55.4 (OCH3); *m/z* (% relative intensity) 312 (M+, 100), 311 (M+-H, 11), 297 (M+-CH3, 13), 269 (M+-CH3-CO, 22), **7b** (66%), mp 207-208 °C (Found: 332.1162. C20H16N2O3 requires 332.1161); max(KBr)/cm-1 1590 (C=N); H(250 MHz; CDCl3) 8.86 (1H, d, *J* 2, 6-H), 8.26 (2H, d, *J* 8, 5-vinyl-Ar-3- and 5-H), 8.18 (1H, dd, *J* 8, *J* 2, 4-H), 8.10 (2H, d, *J* 9, 2-Ar-2 and 6-H), 7.98 (1H, d, *J* 8, 3-H), 7.90 (2H, d, *J* 8, 5-vinyl-Ar-2- and 6-H), 7.64 (1H, d, *J* 16, 5-vinyl-H), 7.56 (1H, d, *J* 16, 5-vinyl-H), 7.05 (2H, d, *J* 9, 2-Ar-3- and 5-H), 3.84 (3H, s, OCH3); C(62.5 MHz; CDCl3) 160.3 (2-Ar-4-C), 155.3 (2-C), 148.8 (6-C), 146.3 (5-vinyl-Ar-4-C),143.7 (5-vinyl-Ar-1-C), 134.0 (4-C), 130.5 (5-C), 129.9 (2-Ar-1-C), 129.6 and 127.4 (vinyl-C), 127.9 (5-vinyl-Ar-2- and 6-C), 127.3 (2-Ar-2- and 6-C), 124.0 (5-vinyl-Ar-3 and 5-C), 119.2 (3-C), 114.1 (2-Ar-3- and 5-C), 55.2 (OCH3); *m/z* (% relative intensity) 332 (M+, 100), 317 (M+-CH3, 6), 302 (M+-NO, 26), 286 (M+-NO2, 5), **7c** (73%), mp 258-260 °C (Found: 345.1365. C22H19NO3 requires 345.1356); max(KBr)/cm-1 1720 (C=O), 1605 (C=N); H(250 MHz; CDCl3) 8.48 (1H, d, *J* 2, 6-H), 7.94 (2H, d, *J* 8, 5-vinyl-Ar-3- and 5-H), 7.92 (2H, d, *J* 9, 2-Ar-2- and 6-H), 7.51 (1H, dd, *J* 8, *J* 2, 4-H), 7.50 (1H, d, *J* 8, 3-H), 7.35 (2H, d, *J* 8, 5-vinyl-Ar-2- and 6-H), 7.08 (2H, d, *J* 9, 2-Ar-3- and 5-H), 6.76 (1H, d, *J* 14, 5-vinyl-H), 6.65 (1H, d, *J* 14, 5-vinyl-H), 3.90 (3H, s, COOCH3), 3.86 (3H, s, OCH3); C(62.5 MHz; CDCl3) 160.6 (CO), 155.7 (2-Ar-4-C), 150.0 (2-C), 149.9 (6-C), 141.3 (5-vinyl-Ar-1-C), 136.5 (4-C), 131.1 and 128.5 (vinyl-C), 130.0 (5-vinyl-Ar-4-C), 129.9 (5-vinyl-Ar-3 and 5-C), 128.7 (2-Ar-2- and 6-C), 128.0 (5-vinyl-Ar-2- and 6-C), 128.0 (5-C), 126.4 (2-Ar-1-C), 119.0 (3-C), 114.1 (2-Ar-3- and 5-C), 55.4 (OCH3), 52.1 (CH3OCO); *m/z* (% relative intensity) 345 (M+, 100), 344 (M+-H, 23), 330 (M+-CH3, 3), 314 (M+-OCH3, 3), 302 (M+-CH3-CO, 5), **7d** (69%), mp 208-209 °C (Found: 288.0714. C18H12N2S requires 288.0704); max(KBr)/cm-1 2224 (CN), 1601 (C=N); H(250 MHz; CDCl3) 8.67 (1H, d, *J* 2, 6-H), 7.86 (1H, dd, *J* 8, *J* 2, 4-H), 7.66 (2H, d, *J* 8, 5-vinyl-Ar-3- and 5-H), 7.65 (1H, d, *J* 8, 3-H), 7.60 (1H, m, 2-thienyl-5-H), 7.60 (2H, d, *J* 8, 5-vinyl-Ar-2- and 6-H), 7.43 (1H, m, 2-thienyl-3-H), 7.18 (1H, d, *J* 16, 5-vinyl-H), 7.14 (1H, m, 2-thienyl-4-H), 7.12 (d, 1H, *J* 16, 5-vinyl-H); C(62.5 MHz; CDCl3) 152.3 (2-C), 148.8 (6-C), 144.4 (2-thienyl-2-C), 141.2 (5-vinyl-Ar-1-C), 133.5 (4-C), 132.5 (5-vinyl-Ar-3- and 5-C), 130.2 (5-C), 128.4 (2-thienyl-4-C), 128.1 (2-thienyl-3-C), 128.2 and 128.0 (5-vinyl-C), 127.0 (5-vinyl-Ar-2- and 6-C), 125.0 (2-thienyl-5-C), 118.8 (5-vinyl-Ar-4-C), 118.7 (3-C), 111.1 (CN); *m/z* (% relative intensity) 288 (M+, 100), 287 (M+-H, 44), **7e** (61%), mp 240-242 °C (Found: 308.0619. C17H12N2O2S requires 308.0615. Found: C, 65.53; H, 3.75; N: 8.83. C17H12N2O2S requires C, 66.22; H, 3.92; N, 9.08); max(KBr)/cm-1 1590 (C=N); H(250 MHz; CDCl3) 8.64 (1H, d, *J* 2, 6-H), 8.18 (2H, d, *J* 8, 5-vinyl-Ar-3- and 5-H), 7.88 (1H, dd, *J* 8, *J* 2, 4-H), 7.78 (2H, d, *J* 8, 5-vinyl-Ar-2- and 6-H), 7.72 (1H, d, *J* 8, 3-H), 7.64 (1H, m, 2-thienyl-3-H), 7.42 (1H, m, 2-thienyl-5-H), 7.32 (1H, d, *J* 16, 5-vinyl-H), 7.28 (1H, d, *J* 16, 5-vinyl-H), 7.08 (1H, m, 2-thienyl-4-H); C(62.5 MHz; CDCl3) not recorded due to poor solubility; *m/z* (% relative intensity) 308 (M+, 100), 307 (M+-H, 42), 278 (M+-NO, 15), 262 (M+-NO2, 11), **7f** (65%), mp 203-204 °C (Found: 321.0823. C19H15NO2S requires 321.0818); max(KBr)/cm-1 1718 (C=O), 1583 (C=N); H(250 MHz; CDCl3) 8.66 (1H, d, *J* 2, 6-H), 8.05 (2H, d, *J* 8, 5-vinyl-Ar-3- and 5-H), 7.85 (1H, dd, *J* 8, *J* 2, 4-H), 7.66 (1H, d, *J* 8, 3-H), 7.58 (1H, m, 2-thienyl-5-H), 7.56 (2H, d, *J* 8, 5-vinyl-Ar-2- and 6-H), 7.42 (1H, m, 2-thienyl-3-H), 7.16 (1H, d, *J*  16, 5-vinyl-H), 7.14 (1H, d, *J* 16, 5-vinyl-H), 7.12 (1H, m, 2-thienyl-4-H), 3.92 (3H, s, COOCH3); C(62.5 MHz; CDCl3) 166.7 (CO), 151.9 (2-C), 149.9 (6-C), 144.5 (2-thienyl-2-C), 141.3 (5-vinyl-Ar-1-C), 133.3 (4-C), 130.7 (5-vinyl-Ar-4-C), 130.1 (5-vinyl-Ar-2 and 6-C), 129.4 (5-C), 128.4 (2-thienyl-4-C), 128.1 (2-thienyl-3-C), 127.4 and 127.2 (5-vinyl-C), 126.4 (5-vinyl-Ar-3 and 5-C), 124.8 (2-thienyl-5-C), 118.7 (3-C), 52.2 (CH3OCO); *m/z* (% relative intensity) 321 (M+, 100), 320 (M+-H, 42), 290 (M+-OCH3, 11), 262 (M+-OCH3-CO, 19).

*1.2. (E,E)-2,5-bis(2-arylvinyl)pyridines* ***13***

*1.2.1. 5-Hydroxymethyl-2-methylpyridine* ***9***

A solution of methyl 6-methylnicotinate (7.55 g, 0.05 mol) in diethylether (50 cm3) was added dropwise to a suspension of lithium aluminum hydride (2.28 g, 0.06 mol) in diethyl ether (200 cm3). The mixture was refluxed and stirred under nitrogen atmosphere for 3 h. Upon cooling the mixture was treated with water and filtered. The residue was washed with hot ethyl acetate and the combined filtrates were evaporated. The residue was subjected to column chromatography on alumina with ethyl acetate as the eluent. Compound **9** was obtained as a yellow oil (5.6 g, 91%), (Found: 123.0683. C7H9NO requires 123.0684); max(KBr)/cm-1 3630 (OH), 1610 (C=N); H(250 MHz; CDCl3) 8.30 (1H, d, *J* 2, 6-H), 7.60 (1H, dd, *J* 8, *J* 2, 4-H), 7.10 (1H, d, *J* 8, 3-H), 5.82 (1H, s, OH), 4.62 (2H, s, CH2), 2.50 (3H, s, CH3); C(62.5 MHz; CDCl3) 156.3 (2-C), 148.7 (6-C), 140.0 (5-C), 135.3 (4-C), 122.8 (3-C), 61.0 (HOCH2), 20.1 (CH3); *m/z* (% relative intensity) 123 (M+, 83), 122 (M+-H, 59), 108 (M+-CH3, 19), 106 (M+-OH, 15), 94 (M+-HCHO, 100).

*1.2.2. 5-Chloromethyl-2-methylpyridine* ***10***

Thionyl chloride (3.8 cm3) was added dropwise to a solution of compound **9** (3.2 g, 0.026 mol) in toluene (30 cm3). The temperature was raised to 100°C and the mixture was strirred at this temperature for 40 min. After evaporating the excess of thionyl chloride and the solvent, the residue was dissolved in water, basified and extracted with chloroform. Purification was done using column chromatography on silica gel with ethyl acetate as the eluent. The 5-chloromethyl-2-methylpyridine **10** was obtained as a reddish oil (3.3 g, 90%), (Found: 141.0347. C7H8NCl requires 141.0345); max(KBr)/cm-1 1603 (C=N); H(250 MHz; CDCl3) 8.48 (1H, d, *J* 2, 6-H), 7.61 (1H, dd, *J* 8, *J* 2, 4-H), 7.16 (1H, d, *J* 8, 3-H), 4.58 (2H, s, ClCH2), 2.55 (3H, s, CH3); C(62.5 MHz; CDCl3) 158.6 (2-C), 148.8 (6-C), 136.4 (4-C), 130.1 (5-C), 123.1 (3-C), 43.1 (ClCH2), 24.1 (CH3); *m/z* (% relative intensity) 141 (M+, 22), 106 (M+-Cl, 100).

*1.2.3. 5-[(E)-2-(4-methoxycarbonylphenyl)-ethenyl]-2-methylpyridine* ***12***

(1) A mixture of compound **10** (3.1 g, 0.022 mol) and of triphenylphosphine (6.34 g) in xylene (80 cm3) was refluxed and stirred for 24 h. Upon cooling the mixture was filtered and washed with hexane and dried in a desiccator. The phosphonium salt **11** (8.3 g, 94%) was obtained as a pink powder.

(2) A mixture of phosphonium salt **11** (8.1 g, 0.02 mol), 4-methoxycarbonylbezaldehyde (3.96 g, 0.024 mol) and of potassium *tert*-butoxide (0.022 mol) in tetrahydrofuran (80 cm3) was refluxed and stirred under nitrogen atmosphere for 20 h. The solvent was removed and the residue was subjected to column chromatography on silica gel with ethyl acetate-chloroform (1 : 1) as the eluent. Recrystallization from a mixture of dichloromethane and hexane gave 3.55 g of **12** as yellow crystals (70%), mp 140-142 °C (Found: 253.1104. C16H15NO2 requires 253.1103); max(KBr)/cm-1 1712 (ester), 1589 (C=N); H(250 MHz; CDCl3) 8.65 (1H, d, *J* 2, 6-H), 8.08 (2H, d, *J* 8, 5-Ar-3- and 5-H), 7.80 (1H, dd, *J* 8, *J* 2, 4-H), 7.60 (2H, d, *J* 8, 5-Ar-2- and 6-H), 7.08 (1H, d, *J* 16, 5-vinyl-H), 7.14 (1H, d, *J* 16, 5-vinyl-H), 7.06 (1H, d, 3-H), 3.90 (3H, s, COOCH3), 2.60 (3H, s, CH3); *m/z* (% relative intensity) 253 (M+, 100), 252 (M+-H, 80), 222 (M+-OCH3, 28), 194 (M+-CO-OCH3, 41)

*1.2.4. 5-[(E)-2-(4-methoxycarbonylphenyl)-ethenyl]-2-[(E)-2-(4-N,N-dimethylamino-phenyl)-ethenyl]pyridine* ***13a***

To a solution of compound **12** (0.62 g, 1.6 mmol) and 4-*N,N-*dimethylaminobenzaldehyde (0.26 g, 1.8 mmol) in toluene (50 cm3), piperidine (10 drops) and acetic acid (8 drops) were added. The mixture was refluxed for three days with removal of water via a Dean-Stark trap. The solvent was removed by distillation and the residue was purified by recrystallization from methanol (three times). This yielded **13a** (41%), mp 260-263 °C (Found: 384.1834. C25H24N2O2 requires 384.1838); max(KBr)/cm-1 1720 (ester), 1602 (C=N); H(400 MHz; CDCl3) 8.67 (1H, d, *J* 1.9, 6-H), 8.04 (2H, d, *J* 8.3, 5-vinyl-Ar-3- and 5-H), 7.81 (1H, dd, *J* 8.2, *J* 1.9, 4-H), 7.60 and 7.01 (2 x 1H, 2 x d, *J* 15.9, 5-vinyl-H), 7.58 (2H, d, *J* 8.3, 5-vinyl-Ar-2- and 6-H), 7.49 (2H, d, *J* 8.8, 2-vinyl-Ar-2- and 6-H), 7.36 (1H, d, *J* 8.2, 3-H), 7.19 and 7.14 (2 x 1H, 2 x d, *J* 16.1, 2-vinyl-H), 6.72 (2H, d, *J* 8.8, 2-vinyl-Ar-3- and 5-H), 3.92 (3H, s, OCH3), 3.01 (6H, s, N(CH3)2); C(62.5 MHz; CDCl3) 166.8 (CO), 160.1 (2-vinyl-Ar-4-C), 155.6 (2-C), 148.9 (6-C), 141.3 (5-vinyl-Ar-1-C), 133.2 (4-C), 132.7 (2-vinyl-C), 130.1 (5-vinyl-Ar-3-C and 5-C), 128.7 (5-vinyl-C), 128.5 (2-vinyl-Ar-2- and 6-C), 127.5 (5-vinyl-C), 126.4 (5-vinyl-Ar-2- and 6-C), 125.4 (2-vinyl-C), 121.7 (3-C), 114.2 (2-vinyl-Ar-2- and 5-C), 55.3 (OCH3), 52.1 (CH3OCO); *m/z* (% relative intensity) 384 (M+, 85), 383 (M+-H, 100), 353 (M+-OCH3, 2).

*1.2.4. 5-[(E)-2-(4-methoxycarbonylphenyl)-ethenyl]-2-[(E)-2-(4-methoxy-phenyl)-ethenyl]pyridine* ***13b***

Thesynthesis of **13b** is analogous to this of **13a**. This yielded **13b** (40%), mp 279-281 °C (Found: 371.1518. C24H21NO3 requires 371.1521); max(KBr)/cm-1 1748 (ester), 1603 (C=N); H(400 MHz; CDCl3) 8.70 (1H, d, *J* 2.1, 6-H), 8.04 (2H, d, *J* 8.2, 5-vinyl-Ar-3- and 5-H), 7.83 (1H, dd, *J* 2.1, *J* 8.2, 4-H), 7.62 and 7.06 (2 x 1H, 2 x d, *J* 15.9, 5-vinyl-H), 7.59 (2H, d, *J* 8.2, 5-vinyl-Ar-2- and 6-H), 7.55 (2H, d, *J* 8.8, 2-vinyl-Ar-2- and 6-H), 7.37 (1H, d, *J* 8.2, 3H), 7.18 (2H, s, 2-vinyl-H), 6.92 (2H, d, *J* 8.8, 2-vinyl-Ar-3- and 5-H), 3.93 (3H, s, OCH3), 3.84 (3H, s, OCH3); C(62.5 MHz; CDCl3) 166.8 (CO), 156.2 (C-2), 150.7 (2-vinyl-Ar-4-C), 148.7 (C-6), 141.4 (5-vinyl-Ar-1-C), 133.6 (C-4), 133.2 (2-vinyl-C), 130.1 (5-vinyl-Ar-3- and 5-C), 128.5 (2-vinyl-Ar-2- and 6-C), 128.3 (5-vinyl-C), 127.6 (5-vinyl-C), 126.4 (5-vinyl-Ar-2- and 6-C), 124.8 (2-vinyl-C), 121.3 (C-3), 112.3 (2-vinyl-Ar-C-3- and C-5), 52.1 (OCH3), 40.3 [N(CH3)2]; *m/z* (% relative intensity, chemical ionization) 372 (M+ +H, 100), 400 (M++H+28, 10).

*1.3. (E)-2-(2-Arylvinyl)- 5-methoxycarbonylpyridines* ***14***

To a solution of methyl 6-methyl-nicotinate (**8**) (0.02 mol) and *para*-substituted benzaldehyde (0.027 mol) in toluene (50 cm3) was added piperidine (1 cm3) and glacial acetic acid (about 0.8 cm3). The mixture was heated to reflux with removal of water via Dean-Stark trap (3 days). The solvent was removed by distillation under reduced pressure and the residue was purified by column chromatography on silica gel with ethyl acetate-dichloromethane (1 : 9) as the eluent. Recrystallization from a mixture of dichloromethane and hexane gave pure compounds **14a** (74%), mp 179-181 °C (Found: 282.1359. C17H18N2O2 requires 282.1368. Found: C, 72.22; H, 6.58; N: 9.93. C17H18N2O2 requires C, 72.32; H, 6.43; N, 9.92); max(KBr)/cm-1 1717 (C=O), 1583 (C=N); H(250 MHz; CDCl3) 9.15 (1H, d, *J* 2, 6-H), 8.18 (1H, dd, *J* 8, *J* 2, 4-H), 7.70 (1H, d, *J* 16, 2-vinyl-H), 7.50 (2H, d, *J* 9, 2-vinyl-Ar-2- and 6-H), 7.35 (1H, d, *J* 8, 3-H), 7.00 (1H, d, *J* 16, 2-vinyl-H), 6.70 (2H, d, *J* 9, 2-vinyl-Ar-3- and 5-H), 3.95 (3H, s, COOCH3), 3.05 (6H, s, NMe2); C(62.5 MHz; CDCl3) 166.0 (CO), 160.3 (2-C), 151.0 (6-C), 150.0 (2-vinyl-Ar-4-C), 137.4 (4-C), 136.0 and 127.3 (2-vinyl-C), 128.9 (2-vinyl-Ar-2- and 6-C), 127.8 (5-C), 124.2 (2-vinyl-Ar-1-C), 120.6 (3-C), 112.1 (2-vinyl-Ar-3- and 5-C), 52.2 (CH3O), 40.2 (NCH3); *m/z* (% relative intensity) 282 (M+, 60), 281 (M+-H, 100) and **14b** (46%), mp 167-169 °C (Found: 269.1048. C16H15NO3 requires 269.1052. Found: C, 71.20; H, 5.49; N, 5.07. C16H15NO3 requires C, 71.36; H, 5.61; N, 5.20); max(KBr)/cm-1 : 1718 (C=O), 1591 (C=N); H(250 MHz; CDCl3) 9.18 (1H, d, *J* 2, 6-H), 8.20 (1H, dd, *J* 8, *J* 2, 4-H), 7.70 (1H, d, *J* 16, 2-vinyl-H), 7.52 (2H, d, *J* 9, 2-vinyl-Ar-2- and 6-H), 7.36 (1H, d, *J* 8, 3-H), 7.04 (1H, d, *J* 16, 2-vinyl-H), 6.90 (2H, d, *J* 9, 2-vinyl-Ar-3- and 5-H), 4.00 (3H, s, COOCH3), 3.82 (3H, s, OCH2); C(62.5 MHz; CDCl3) 165.9 (CO), 160.4 (4’-C), 159.6 (2-C), 151.0 (6-C), 137.6 (4-C), 135.2 and 124.8 (2-vinyl-C), 128.9 (2-vinyl-Ar-1-C), 128.9 (2-vinyl-Ar-2- and 6-C), 123.5 (5-C), 121.1(3-C), 114.3 (2-vinyl-Ar-3- and 5-C), 55.3 (OCH3), 52.2 (CH3O); *m/z* (% relative intensity) 269 (M+, 35), 268 (M+-H, 100), 254 (M+-CH3, 5).
